# Supplementary material for: Neutrophil extracellular traps-associated modification patterns depict the tumor microenvironment, precision immunotherapy, and prognosis of clear cell renal cell carcinoma
Source: PubMed Central journal article supplement (PMC9813599; doi:10.3389/fonc.2022.1094248), 2022-12-22

Figure S1

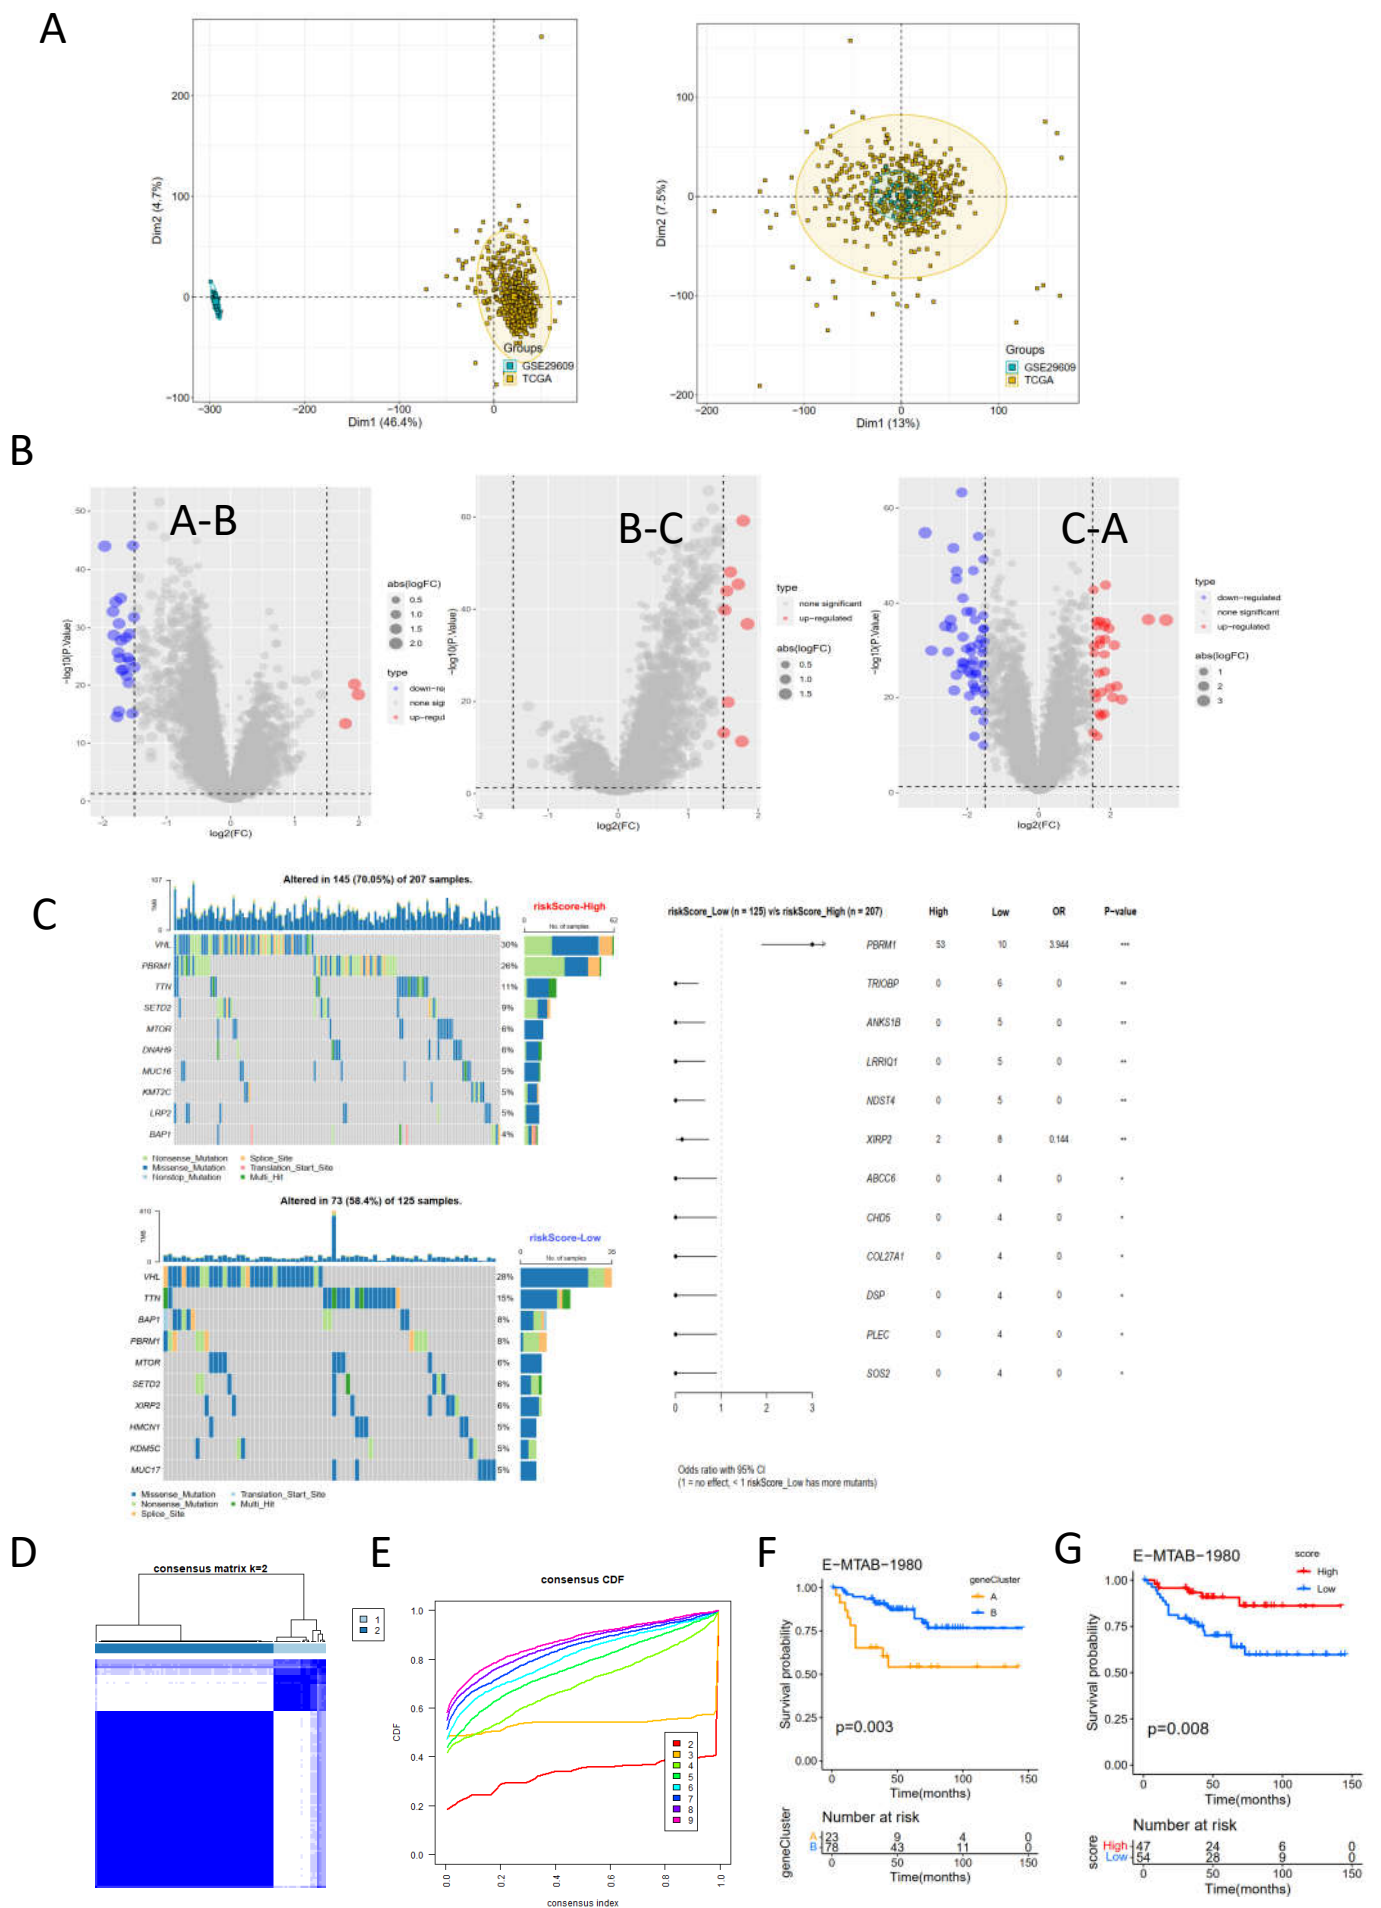

Supplement: Image_1.pdf [file Image_1.pdf]
